# Supplementary material for: HIF-2α upregulation mediated by hypoxia promotes NAFLD-HCC progression by activating lipid synthesis via the PI3K-AKT-mTOR pathway
Source: Aging (Albany NY). 2019 Dec 4;11(23):10839–60. doi: 10.18632/aging.102488 (PMC6932893; doi:10.18632/aging.102488)
Supplement: Supplementary Figure 1 [file aging-11-102488-s002..pdf]

## SUPPLEMENTARY FIGURE

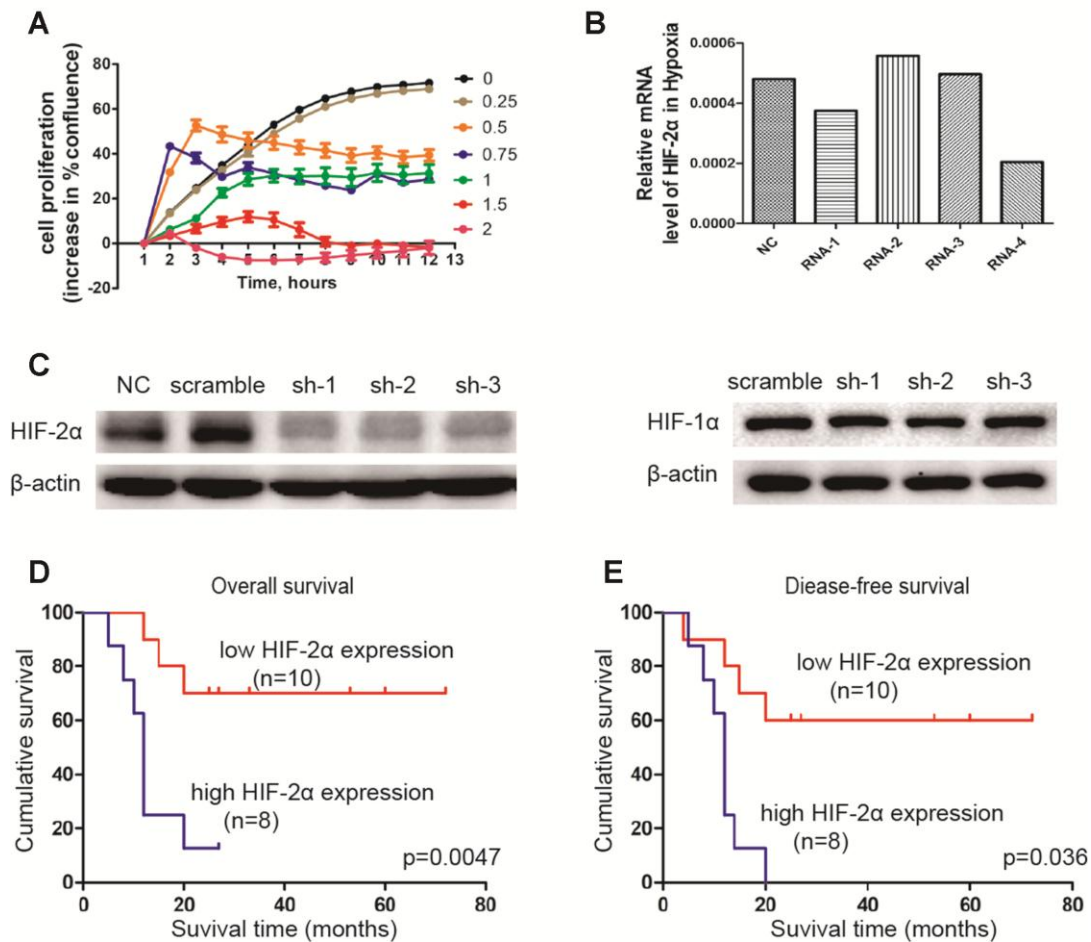

**Supplementary Figure 1.** (A), Summary graph showing the HCC cell 2D growth rate in different FFA concentration. (B), Quantitative RT-PCR assessment of HIF-2 $\alpha$  expression in sh-HIF2 $\alpha$  HCC cells under hypoxic conditions. Transcription levels were normalized to those of  $\beta$ -actin. (C) Western blot analysis of HIF-2 $\alpha$  and HIF-1 $\alpha$  expression in sh-HIF2 $\alpha$  HCC cells under hypoxic conditions.  $\beta$ -actin was used as the loading control. (D,E) Survival curves of 18 NAFLD-HCC patients stratified according to HIF-2 $\alpha$  protein expression.
