# Supplementary material for: HIF-2α upregulation mediated by hypoxia promotes NAFLD-HCC progression by activating lipid synthesis via the PI3K-AKT-mTOR pathway
Source: Aging (Albany NY). 2019 Dec 4;11(23):10839–60. doi: 10.18632/aging.102488 (PMC6932893; doi:10.18632/aging.102488)
Supplement: Supplementary Table 1 [file aging-11-102488-s001..xlsx]

## Sheet: Sheet1
Genes	PearsonCC
PALM2-AKAP2	0.71
LRRC32	0.67
SASH1	0.67
CDH5	0.66
LDB2	0.64
CD93	0.63
FLT4	0.63
SNRK	0.63
AKAP2	0.62
GPR116	0.62
ERG	0.62
SYNPO2	0.61
IGFBP7	0.61
ELK3	0.6
TIE1	0.6
FAM198B	0.6
TCF4	0.6
MMRN2	0.6
GPR4	0.6
CRISPLD2	0.6
SH2D3C	0.6
FBLN2	0.59
MEF2C	0.59
PIK3R3	0.59
MYCT1	0.59
ARL15	0.59
TEK	0.58
GGT5	0.58
TNS1	0.58
AOC3	0.58
PCDH12	0.58
NOVA2	0.58
PLVAP	0.58
CYYR1	0.58
ARHGEF15	0.57
PDGFRB	0.57
ADCY4	0.57
BCL6B	0.57
PPP1R12B	0.57
TGFBR2	0.56
PTPRB	0.56
CALCRL	0.56
PODN	0.56
ZNF641	0.56
KDR	0.56
SCARF1	0.56
ENG	0.56
PDE2A	0.56
NFASC	0.56
SGK269	0.56
GIMAP8	0.55
RALGAPA2	0.55
ROBO4	0.55
EBF1	0.55
TLN1	0.55
F2R	0.55
TMEM204	0.55
EFNB2	0.55
ETS1	0.55
ARHGAP31	0.55
MRVI1	0.54
C20orf160	0.54
LHFP	0.54
MEF2A	0.54
TANC1	0.54
LRRC70	0.54
HSPG2	0.54
TCF21	0.54
SPRY1	0.54
ITGA1	0.54
PIK3C2A	0.54
COL4A1	0.54
FXYD6	0.53
PEAR1	0.53
CALD1	0.53
RGS5	0.53
FLT1	0.53
KIDINS220	0.53
EMP1	0.53
ESAM	0.53
SPRED2	0.53
HECW2	0.53
CLEC14A	0.53
EFEMP2	0.53
CDK17	0.53
C14orf43	0.53
CCDC80	0.53
SPARC	0.53
SLCO2A1	0.53
ANTXR1	0.53
NOTCH4	0.53
CXorf36	0.52
COL4A2	0.52
HEG1	0.52
GPBAR1	0.52
PMP22	0.52
CYBRD1	0.52
ACTA2	0.52
JHDM1D	0.52
ZEB2	0.52
TBCEL	0.52
PLEKHG1	0.52
CD248	0.52
COL14A1	0.52
CLEC3B	0.51
GNAQ	0.51
S1PR1	0.51
DNAJB5	0.51
EMCN	0.51
PCDH17	0.51
DOCK9	0.51
2018-09-11	0.51
EDNRB	0.51
AEBP1	0.51
ATG2B	0.51
FAM70B	0.51
PREX1	0.51
ARHGEF12	0.51
BMPR2	0.51
FBN1	0.51
AKAP13	0.51
ZEB1	0.5
SEC14L1	0.5
GNA11	0.5
FHL1	0.5
GPR124	0.5
2018-09-07	0.5
LTBP2	0.5
EXOC3L2	0.5
MTMR9	0.5
C9orf102	0.5
PTGIR	0.5
ADARB1	0.5
CD34	0.5
ADCY3	0.5
ARHGAP23	0.5
DCUN1D3	0.5
THBD	0.5
FBLN5	0.5
LOC284441	0.5
EDNRA	0.5
PTRF	0.5
MFRP	0.5
ENTPD1	0.5
ABL1	0.49
TSPAN18	0.49
FBXL3	0.49
TBC1D12	0.49
C7	0.49
MYST3	0.49
ZCCHC24	0.49
GNG11	0.49
FILIP1L	0.49
MEIS3P1	0.49
ARL5B	0.49
GJA4	0.49
DLC1	0.49
REST	0.49
ZNF791	0.49
TSHZ1	0.49
ELF1	0.49
PLBD2	0.49
SYNE1	0.49
PCDHGC3	0.49
HIPK3	0.49
NRIP2	0.49
TGFB1I1	0.49
MED13L	0.49
C9orf41	0.49
IL6ST	0.49
IGFBP5	0.49
APLNR	0.49
SH2B3	0.49
BIRC6	0.48
HIVEP1	0.48
RAPGEF1	0.48
SETX	0.48
AFAP1L1	0.48
ADAMTS1	0.48
CRTC3	0.48
RAPGEF6	0.48
HIC1	0.48
SOCS5	0.48
DPP8	0.48
GJD3	0.48
COL15A1	0.48
HSPB2	0.48
MAP1B	0.48
EP300	0.48
OSBPL8	0.48
SLK	0.48
QKI	0.48
SMOC2	0.48
HCFC2	0.48
ADAMTS7	0.48
ARHGAP1	0.48
ZMAT3	0.48
IGFBP4	0.48
RHOJ	0.48
TSTD2	0.48
TIMP3	0.48
FCHSD2	0.48
MMRN1	0.48
PHF2	0.48
MYST4	0.48
ZBTB43	0.48
GLIPR2	0.47
HEATR5A	0.47
TRAF6	0.47
CLIC4	0.47
ACAP2	0.47
MBP	0.47
RSF1	0.47
ITPRIP	0.47
PJA2	0.47
GTF2A1	0.47
CSGALNACT2	0.47
CRK	0.47
CDC42EP3	0.47
MTMR6	0.47
KLHL28	0.47
PODXL	0.47
RHBDD1	0.47
TBXA2R	0.47
SOX17	0.47
FAM122A	0.47
WDR7	0.47
AKAP11	0.47
RNF180	0.47
EPC1	0.47
LRRC8A	0.47
XRN1	0.47
LRCH1	0.47
SERINC3	0.47
SEPN1	0.47
CCDC102B	0.47
PLAT	0.47
DKFZp761E198	0.47
SFRP4	0.47
HEPH	0.47
ZBTB47	0.47
SKIL	0.47
UACA	0.47
DDX3X	0.47
SNX9	0.47
APC	0.47
GJA5	0.47
ABCA1	0.47
MYH9	0.47
PAFAH1B2	0.47
USP6NL	0.46
LTBP4	0.46
TNKS2	0.46
SKI	0.46
RAPGEF5	0.46
DOPEY1	0.46
RCBTB2	0.46
KLF3	0.46
ZFP106	0.46
RAB14	0.46
SCYL2	0.46
KCTD12	0.46
NOTCH3	0.46
KIAA2018	0.46
TMEM184C	0.46
SBNO1	0.46
RP2	0.46
THBS2	0.46
LUZP1	0.46
GIMAP6	0.46
ASPN	0.46
DCN	0.46
ACTR2	0.46
SOS2	0.46
ZZEF1	0.46
MLL3	0.46
PGF	0.46
CDH13	0.46
OSBP	0.46
RDX	0.46
MAP3K6	0.46
ATP11B	0.46
ETV3	0.46
RASGEF1B	0.46
DCHS1	0.46
FZD4	0.46
DENND4A	0.46
NGFR	0.46
PEX26	0.46
TNRC6B	0.46
IKZF4	0.46
C10orf118	0.46
DICER1	0.46
RAPGEF3	0.46
CDC42BPB	0.46
KLF2	0.46
KDM6B	0.46
STRN3	0.46
TMOD2	0.46
SETBP1	0.46
APOLD1	0.46
LZTS1	0.46
FAM190B	0.46
LATS2	0.46
AHDC1	0.46
ARHGAP21	0.46
NHLRC2	0.46
MLL5	0.46
SFRS2IP	0.46
ROCK1	0.46
ZFP91	0.46
2018-09-08	0.46
SLC10A7	0.45
CREB1	0.45
CDKN2AIP	0.45
NOS3	0.45
PCSK5	0.45
TRIP11	0.45
CCNT1	0.45
PDLIM5	0.45
PLEKHA1	0.45
RASSF2	0.45
C14orf4	0.45
TOP1	0.45
AHNAK	0.45
HMBOX1	0.45
TGFBRAP1	0.45
MKL2	0.45
KCNE4	0.45
ADAMTS4	0.45
C2CD2	0.45
KBTBD7	0.45
ZNF41	0.45
TEX2	0.45
PTPLB	0.45
LRRC8C	0.45
ZNF281	0.45
CYTH3	0.45
FAM114A1	0.45
LGR4	0.45
ZDHHC20	0.45
NUMB	0.45
CLIP3	0.45
PRKAA1	0.45
GABPA	0.45
DDX6	0.45
PIKFYVE	0.45
PPP1R12A	0.45
BAG4	0.45
USP12	0.45
ARAP3	0.45
SORBS1	0.45
SPRY2	0.45
HERC3	0.45
MCC	0.45
PCNX	0.45
ARHGAP18	0.45
CUL5	0.45
ZNF800	0.45
CCPG1	0.45
AFF4	0.45
SPTLC2	0.45
FNDC3A	0.45
RAMP2	0.45
TOB2	0.44
ABR	0.44
USP38	0.44
EPC2	0.44
FAM168A	0.44
EEA1	0.44
ATAD2B	0.44
PELI1	0.44
LEMD3	0.44
NOD1	0.44
ZBTB1	0.44
HEYL	0.44
ARFGEF2	0.44
DLL4	0.44
IGFBP6	0.44
MAPK8	0.44
KBTBD4	0.44
FAM129A	0.44
LMO2	0.44
SSH1	0.44
ZNF654	0.44
RNF169	0.44
CPXM2	0.44
TNXB	0.44
KIAA1012	0.44
RBM7	0.44
MAN1A2	0.44
RAB2B	0.44
ZNF776	0.44
SMARCA5	0.44
MYH11	0.44
DCUN1D1	0.44
PPP2R5E	0.44
PPP1R14A	0.44
TMCC3	0.44
KIAA0494	0.44
THY1	0.44
ELTD1	0.44
FMNL3	0.44
GRK5	0.44
PLSCR4	0.44
EHD2	0.44
ARID1B	0.44
MAGI1	0.44
SLC35F5	0.44
ITGBL1	0.44
MXRA7	0.44
YPEL2	0.44
LPP	0.44
FUBP3	0.44
B4GALT1	0.44
SAMD8	0.44
OTUD4	0.44
C9orf129	0.44
HSPA12B	0.44
C14orf118	0.44
MLL2	0.44
B3GNT2	0.44
MFAP3	0.44
EVI5	0.44
ATF7IP	0.44
GEM	0.44
RELL1	0.44
STAG1	0.44
CASKIN2	0.44
PDE1B	0.44
DNAJB14	0.44
PARVA	0.44
KIAA1217	0.44
RABGAP1	0.44
MYCBP2	0.44
SYNJ1	0.44
ARHGEF17	0.44
CNOT6L	0.44
PPM1K	0.44
CELF1	0.44
DHX33	0.44
EIF2AK3	0.44
TAGLN	0.44
ACER3	0.43
MFGE8	0.43
SNX18	0.43
RBM16	0.43
RASGRP3	0.43
SYT11	0.43
NAB1	0.43
ITCH	0.43
WDFY1	0.43
PIK3R4	0.43
MOBKL2C	0.43
MATN2	0.43
CALHM2	0.43
KIAA0586	0.43
GRINL1A	0.43
CHUK	0.43
PLDN	0.43
CAB39	0.43
ANGPTL2	0.43
TMEM30A	0.43
ZNF510	0.43
ZBTB11	0.43
SH3PXD2A	0.43
PAPOLG	0.43
CPEB4	0.43
NCOA1	0.43
MYL9	0.43
COG6	0.43
ANTXR2	0.43
TBC1D2B	0.43
SENP6	0.43
VEGFC	0.43
SRBD1	0.43
KIAA1274	0.43
CXCL12	0.43
TMF1	0.43
DCAF5	0.43
UBXN4	0.43
TRUB1	0.43
RCOR1	0.43
RAPGEF2	0.43
ZNF440	0.43
AFF1	0.43
RAB3GAP1	0.43
PTPN11	0.43
SPOPL	0.43
SIRPB1	0.43
DENND5A	0.43
ALKBH8	0.43
CDK8	0.43
OLFML2A	0.43
TANK	0.43
KALRN	0.43
ZNF689	0.43
GOLPH3	0.43
ZNF609	0.43
UVRAG	0.43
TBC1D1	0.43
LATS1	0.43
RNF160	0.43
TIRAP	0.43
FNBP1	0.43
RND3	0.43
TJP1	0.43
YLPM1	0.43
THAP1	0.43
WDR82	0.43
CPSF2	0.43
PIK3CA	0.43
ANKRD12	0.43
FOXO3	0.43
UTRN	0.43
KIAA0355	0.43
NR2C2	0.43
SCN4B	0.43
ATP13A3	0.43
MAP3K2	0.43
RNF6	0.43
CHD9	0.42
LOC100132707	0.42
SH3PXD2B	0.42
ZFP36L1	0.42
CHURC1	0.42
RGPD3	0.42
MCAM	0.42
ERN1	0.42
KIAA1109	0.42
ZFX	0.42
MAPK1	0.42
SYTL2	0.42
KANK2	0.42
CTNND1	0.42
USO1	0.42
FBXO8	0.42
CNRIP1	0.42
C11orf30	0.42
FERMT2	0.42
CBL	0.42
FYTTD1	0.42
LRCH3	0.42
C4orf29	0.42
TENC1	0.42
COQ10B	0.42
BOD1L	0.42
PAM	0.42
COL12A1	0.42
IREB2	0.42
HIVEP2	0.42
TLR4	0.42
GALNT11	0.42
AKT1	0.42
PSEN1	0.42
ZAK	0.42
UBXN7	0.42
PROX1	0.42
SIK2	0.42
PIP5K1C	0.42
UBR1	0.42
SHOC2	0.42
FBXW7	0.42
RC3H2	0.42
SNAPC3	0.42
FOXO3B	0.42
KIAA1671	0.42
SERINC1	0.42
ATE1	0.42
TADA2B	0.42
FRMD4B	0.42
CCNI	0.42
FBXO11	0.42
PPM1A	0.42
KDM6A	0.42
ARHGAP15	0.42
SEMA3G	0.42
PRDM10	0.42
TSPYL1	0.42
EXOC3L	0.42
C5orf41	0.42
UGCG	0.42
TMEM127	0.42
CHD6	0.42
WDR36	0.42
ATAD1	0.42
RBM9	0.42
CCL14	0.42
MCFD2	0.42
HECTD1	0.42
TSC22D2	0.42
SP3	0.42
BAG5	0.42
NFKB1	0.42
RBM25	0.42
EXOC5	0.42
USP9X	0.42
SPIN1	0.42
GAPVD1	0.42
TMEM173	0.42
TRIM44	0.42
ZMYND11	0.42
C17orf85	0.42
BDP1	0.42
NF1	0.42
ZDHHC17	0.42
CCDC3	0.42
MORC3	0.42
COL4A3BP	0.42
SMEK1	0.42
CCNT2	0.42
KIAA0430	0.42
NOTCH1	0.42
PATL1	0.42
KIAA0317	0.42
ADAMTS2	0.42
KANK3	0.42
SCARF2	0.42
HYAL2	0.42
DOCK1	0.42
LYSMD3	0.42
TP53I11	0.42
PRELP	0.42
ZNF148	0.42
ITSN2	0.42
MARVELD1	0.42
SLC30A6	0.42
INMT	0.42
STRN	0.42
EIF2C4	0.42
TAOK3	0.41
MIA2	0.41
TMED7	0.41
HMGXB4	0.41
CCDC75	0.41
TBC1D15	0.41
SORBS3	0.41
DIP2B	0.41
RREB1	0.41
ZFHX3	0.41
SUSD2	0.41
VASH1	0.41
UTP14C	0.41
DPY19L3	0.41
ARID2	0.41
SLC25A40	0.41
BAZ2B	0.41
GNAI2	0.41
KIAA1430	0.41
NR3C1	0.41
LONP2	0.41
CYLD	0.41
ZNF192	0.41
FAM160B1	0.41
ZNF136	0.41
MBNL2	0.41
CSNK2A1P	0.41
2018-03-05	0.41
FRMD6	0.41
EHBP1	0.41
SLC41A2	0.41
ZNF295	0.41
AMOTL1	0.41
MOAP1	0.41
HOOK3	0.41
FAM126B	0.41
SNX13	0.41
CD200	0.41
SPTY2D1	0.41
TMED10	0.41
IDE	0.41
KLHL23	0.41
CCNG2	0.41
RNF168	0.41
GOPC	0.41
CLOCK	0.41
SMYD4	0.41
STX12	0.41
COX7A1	0.41
DACT1	0.41
FSTL1	0.41
MAP3K12	0.41
ATRX	0.41
COL6A2	0.41
EGFLAM	0.41
C9orf80	0.41
SMAD5	0.41
PLAC9	0.41
PAPD4	0.41
DOCK4	0.41
SLAIN2	0.41
IGF2R	0.41
DUSP7	0.41
RAB8B	0.41
CYFIP1	0.41
FEM1B	0.41
CRYBG3	0.41
TGOLN2	0.41
ARID4A	0.41
USHBP1	0.41
DYRK1A	0.41
CCND2	0.41
RANBP2	0.41
TAOK1	0.41
SUCLA2	0.41
MSRB3	0.41
RSRC1	0.41
FLI1	0.41
STARD8	0.41
TM9SF3	0.41
KLHL5	0.41
FAM13B	0.41
FAM65A	0.41
TRIO	0.41
ACVRL1	0.41
SLC12A6	0.41
FABP3	0.41
RIF1	0.41
BRD1	0.41
NCKAP1	0.41
STX17	0.41
MGAT2	0.41
USP47	0.41
GIGYF2	0.41
FAM179B	0.41
MYO5A	0.41
PTPRA	0.41
GNA14	0.41
SYNPO	0.41
ELMO2	0.4
PPP2R2A	0.4
DDX21	0.4
IRF2	0.4
KLHL20	0.4
EML1	0.4
CDK12	0.4
NUP50	0.4
ENTPD5	0.4
WDR47	0.4
ARHGEF6	0.4
APPL1	0.4
SMEK2	0.4
KLHL24	0.4
BCLAF1	0.4
ZNF25	0.4
INO80D	0.4
OPA1	0.4
CREBBP	0.4
ATP6V1A	0.4
ANKRD17	0.4
TINAGL1	0.4
GNA13	0.4
PUM2	0.4
ATF2	0.4
IL4R	0.4
SEC24A	0.4
INO80	0.4
SLC30A9	0.4
YY1	0.4
DIS3	0.4
MYLIP	0.4
MPZL3	0.4
HFE	0.4
BTBD7	0.4
NPTN	0.4
RBM27	0.4
C6orf72	0.4
GIT2	0.4
HIPK1	0.4
BGN	0.4
NCOA6	0.4
ZNF317	0.4
THBS1	0.4
ESYT2	0.4
JAM3	0.4
MOBKL1B	0.4
SLIT3	0.4
STX7	0.4
CTGF	0.4
NAV1	0.4
MLH3	0.4
SHROOM2	0.4
ECE1	0.4
ASXL2	0.4
FAM126A	0.4
MYLK	0.4
KIAA1370	0.4
SEC62	0.4
LOC647979	0.4
BZW1	0.4
PRRC1	0.4
JUNB	0.4
ANKRD50	0.4
ELF2	0.4
UEVLD	0.4
GAB1	0.4
SNX6	0.4
CAMSAP1	0.4
ZNF264	0.4
IFNAR1	0.4
YTHDC2	0.4
VPS4B	0.4
CLASP1	0.4
FUT11	0.4
ATP2B4	0.4
GJC1	0.4
RBAK	0.4
C5orf24	0.4
PAFAH1B1	0.4
PHC3	0.4
STAT3	0.4
PTAR1	0.4
PECAM1	0.4
CCDC82	0.4
TIMP2	0.4
MIB1	0.4
ARHGAP42	0.4
ITGB1	0.4
EPS15	0.4
GNS	0.4
FNIP2	0.4
EIF3A	0.4
ZNF616	0.4
FAM53B	0.4
LPHN2	0.4
C1QTNF1	0.4
KLF11	0.4
SPEN	0.4
IL1RAP	0.4
RSBN1L	0.4
MGA	0.4
ANKFY1	0.4
KLHL8	0.4
ZFYVE26	0.4
NAA30	0.4
SEMA5A	0.4
SNX19	0.4
PLEKHG5	0.4
ZER1	0.4
STAM2	0.4
HECA	0.4
SEC24D	0.4
PLIN4	0.4
SH3BGRL	0.4
PEX13	0.4
ZSWIM6	0.4
ZNF333	0.4
CREB3L2	0.4
FRMD8	0.4
EIF5	0.4
NBPF10	0.4
C21orf91	0.4
TCF7L2	0.4
ZNF37A	0.4
RBM43	0.4
FAM98B	0.4
FAM76B	0.4
SENP7	0.4
PLD1	0.4
ZNF649	0.4
SPAG9	0.4
RALGAPB	0.4
RB1	0.4
CD164	0.4
MYADM	0.4
PTEN	0.4
RASSF3	0.4
SWAP70	0.4
LEPROT	0.4
ADAM10	0.4
NEXN	0.4
KLC1	0.4
CENPC1	0.4
SEMA4C	0.4
USP42	0.39
HSPA2	0.39
SHE	0.39
UBE2H	0.39
BRMS1L	0.39
ZNF17	0.39
HIAT1	0.39
KIAA1737	0.39
RBM12	0.39
PTPN1	0.39
PTPN21	0.39
SECISBP2L	0.39
WRN	0.39
C18orf25	0.39
SETD7	0.39
RSRC2	0.39
NOV	0.39
POLK	0.39
SERPINB9	0.39
ZFP36	0.39
ZNF561	0.39
EFEMP1	0.39
LUM	0.39
GIPC3	0.39
SYPL1	0.39
IKZF5	0.39
KIF5B	0.39
FOXJ2	0.39
LRP6	0.39
MGLL	0.39
SCARB2	0.39
NAF1	0.39
PDS5A	0.39
TXLNG	0.39
RAB6A	0.39
CHD2	0.39
ITPKB	0.39
KBTBD2	0.39
TBRG1	0.39
SH3GLB1	0.39
PPTC7	0.39
NEK1	0.39
ITPR1	0.39
DHFRL1	0.39
WDR11	0.39
RAB12	0.39
EPB41L5	0.39
PDE12	0.39
C10orf26	0.39
SLC33A1	0.39
LIN52	0.39
KCTD10	0.39
VEZT	0.39
SMG1	0.39
ARFIP1	0.39
LOC282997	0.39
GTF2I	0.39
TRAK1	0.39
LIMA1	0.39
PDS5B	0.39
SNTB2	0.39
LMTK2	0.39
LNX2	0.39
FCHO2	0.39
ENTPD7	0.39
SNTA1	0.39
FBXO3	0.39
LRRFIP1	0.39
RPS6KA2	0.39
AXL	0.39
AFAP1	0.39
PURA	0.39
THRA	0.39
ADNP	0.39
RNF41	0.39
N4BP2	0.39
AKAP10	0.39
ZNF592	0.39
GTF2H3	0.39
ZNF420	0.39
SON	0.39
PRRG1	0.39
DMXL1	0.39
YAF2	0.39
FTO	0.39
RAB3GAP2	0.39
DNAJC27	0.39
PRKCH	0.39
RAB1A	0.39
GAS6	0.39
DCAF17	0.39
RC3H1	0.39
RNF141	0.39
SOCS6	0.39
ARID5B	0.39
ZNF441	0.39
TECPR2	0.39
ANKRD36BP1	0.39
STK4	0.39
ZFYVE21	0.39
PDLIM3	0.39
PPP1R15B	0.39
DPYD	0.39
DLST	0.39
TWSG1	0.39
POLR2A	0.39
CPE	0.39
TBC1D5	0.39
CGGBP1	0.39
NFIC	0.39
ONECUT1	0.39
TAF13	0.39
DENND1B	0.39
FAM172A	0.39
BAZ1A	0.39
TMEM33	0.39
YES1	0.39
PIP4K2A	0.39
GUCY1A3	0.39
NRIP1	0.39
CASD1	0.39
ZRANB1	0.39
TTC28	0.39
RAB27A	0.39
ZNF436	0.39
HEATR3	0.39
MIER1	0.38
SLC25A46	0.38
RICTOR	0.38
GPATCH8	0.38
TRIM56	0.38
PHF12	0.38
SOCS4	0.38
PIK3C2B	0.38
USP15	0.38
PTPRG	0.38
HELZ	0.38
WWC2	0.38
EXD2	0.38
IPO8	0.38
AQR	0.38
ADAMTSL2	0.38
ATP6V1B2	0.38
RIN3	0.38
SP1	0.38
RGP1	0.38
RAB43	0.38
UBR3	0.38
ZNF24	0.38
ZNF417	0.38
MAPRE2	0.38
KIF13A	0.38
ASCC3	0.38
DNAJC22	0.38
LMBRD1	0.38
CAMK2D	0.38
ZNF407	0.38
TMTC3	0.38
SMAD7	0.38
FGFR2	0.38
MEGF9	0.38
CMTM6	0.38
ADPRH	0.38
TET2	0.38
EIF4G2	0.38
WAPAL	0.38
EIF4G3	0.38
MFSD8	0.38
ARL13B	0.38
FAM110C	0.38
MED14	0.38
DTWD2	0.38
TOR1A	0.38
C4orf41	0.38
AAK1	0.38
PKD1	0.38
NACC2	0.38
TCF12	0.38
MYNN	0.38
ZBTB7A	0.38
UBL3	0.38
SF3B1	0.38
MON2	0.38
RABEP1	0.38
PPAP2B	0.38
F3	0.38
RFX7	0.38
MEX3C	0.38
MTRR	0.38
KIAA1632	0.38
SNN	0.38
SNAI1	0.38
RBM26	0.38
GNG2	0.38
TSPAN14	0.38
FEM1C	0.38
GOLGA2	0.38
SPRY4	0.38
BOC	0.38
MPRIP	0.38
MEF2D	0.38
SEC22B	0.38
RAB31	0.38
SMCR7L	0.38
SLC9A1	0.38
PXK	0.38
GRAMD3	0.38
MAP3K3	0.38
SLC12A4	0.38
CBLL1	0.38
DDHD2	0.38
EML3	0.38
TTC3	0.38
WDR26	0.38
SYNJ2BP	0.38
ZMYM2	0.38
LPL	0.38
SYNM	0.38
NDST1	0.38
KIAA0247	0.38
PLA2G5	0.38
HIP1	0.38
RAB7A	0.38
FRYL	0.38
SGK1	0.38
AMMECR1L	0.38
SETD1B	0.38
ERC1	0.38
CYTSA	0.38
LOC144438	0.38
MOSPD2	0.38
NPAT	0.38
PBRM1	0.38
NEK7	0.38
PPP2CB	0.38
USP25	0.38
RALGDS	0.38
DENND2C	0.38
RBBP5	0.38
CERCAM	0.38
ING3	0.38
GMFB	0.38
VPRBP	0.38
ELL	0.38
TUBGCP4	0.38
RSPRY1	0.38
SYDE1	0.38
MYO6	0.38
SMAD4	0.38
SACM1L	0.38
ERCC6	0.38
TCP11L2	0.38
TMED4	0.38
UBE2G1	0.38
C1orf55	0.38
SPCS3	0.38
LAMC3	0.38
VKORC1L1	0.38
GRAP	0.38
INPP4A	0.38
PPM1D	0.38
TBX2	0.38
SLC27A1	0.38
REV3L	0.38
GFM1	0.38
SEC23A	0.38
PRKRIR	0.38
C22orf30	0.38
GTDC1	0.38
VPS13B	0.38
CHD8	0.37
RAB33B	0.37
GCC2	0.37
SEC23IP	0.37
ITSN1	0.37
ASTN2	0.37
CPD	0.37
BTBD10	0.37
ZC3H14	0.37
C4orf32	0.37
ZNF121	0.37
TM9SF2	0.37
UPF2	0.37
TMOD3	0.37
TBC1D8B	0.37
TRIM5	0.37
PRKAR2A	0.37
ANKRD28	0.37
SILV	0.37
ZBTB6	0.37
KCTD20	0.37
FAM116A	0.37
SNX30	0.37
FAM115A	0.37
MFSD9	0.37
AP4E1	0.37
PAK2	0.37
SLC35A5	0.37
LIMS1	0.37
ZBTB4	0.37
FAM175B	0.37
RAB18	0.37
KDSR	0.37
UHMK1	0.37
GUCY1B3	0.37
NIPAL2	0.37
SIK3	0.37
LAMA4	0.37
ZNF557	0.37
DDX5	0.37
KIAA0528	0.37
PLCL2	0.37
STAT5A	0.37
TNFRSF1A	0.37
CDC40	0.37
SETD3	0.37
WFS1	0.37
NCK1	0.37
RECQL	0.37
PTPN12	0.37
MXRA8	0.37
CTDSPL2	0.37
ZNF175	0.37
TEX261	0.37
SFRS13A	0.37
ZNF721	0.37
PRRG4	0.37
AEBP2	0.37
MYO18A	0.37
ATM	0.37
SLC4A7	0.37
C3orf63	0.37
EHD3	0.37
SETDB2	0.37
DOCK5	0.37
COPB1	0.37
ZMIZ1	0.37
PLEKHM2	0.37
YTHDC1	0.37
ATRN	0.37
ARF6	0.37
INTS6	0.37
PPIL4	0.37
TRIP12	0.37
HINT3	0.37
TMEM170A	0.37
LOC100130776	0.37
METTL14	0.37
SEC24B	0.37
ZNF91	0.37
EVI5L	0.37
PCYT1A	0.37
FKBP14	0.37
SYNRG	0.37
KIAA2026	0.37
KPNA1	0.37
NUP98	0.37
ZC3H7B	0.37
PPM1B	0.37
FGFR1OP2	0.37
ZNF180	0.37
EIF4E3	0.37
GXYLT1	0.37
NMD3	0.37
ATP2A2	0.37
SLMAP	0.37
GNG12	0.37
SLC2A10	0.37
FAM49A	0.37
MCF2L	0.37
FCF1	0.37
GRRP1	0.37
ARL5A	0.37
KIAA1712	0.37
PACS2	0.37
ZNF543	0.37
FAM188A	0.37
TRAPPC10	0.37
GTF3C4	0.37
SNED1	0.37
TMEM106B	0.37
G2E3	0.37
GATA6	0.37
ZNF484	0.37
TNFSF12	0.37
ATXN7	0.37
FBXO38	0.37
UBE3A	0.37
TPST1	0.37
SRRM2	0.37
SPRED1	0.37
ERLEC1	0.37
VPS13D	0.37
DCTN6	0.37
SEL1L	0.37
PNRC2	0.37
SFRS15	0.37
CYP20A1	0.37
TRRAP	0.37
ZNF708	0.37
ENPP1	0.37
SPATA13	0.37
HIATL1	0.37
INHBC	0.37
ZZZ3	0.37
CAST	0.37
THRAP3	0.37
WHSC1L1	0.37
KDM2A	0.37
C1orf58	0.37
SPG20	0.37
FAM193A	0.37
MKLN1	0.37
TAOK2	0.37
FAM160A2	0.37
KIAA0776	0.37
PANK3	0.37
LOC100129034	0.37
ADAT1	0.37
FAM102B	0.37
BCL2L2	0.37
CAV1	0.37
GNPDA2	0.37
CSRNP2	0.37
KIAA1267	0.37
TTC37	0.37
PPP3CA	0.37
PTPN9	0.37
SSFA2	0.37
NR2F2	0.37
ALS2	0.37
GFPT1	0.37
MAML1	0.37
ABHD13	0.37
FAM108B1	0.37
TECPR1	0.37
GMCL1	0.37
BAT2L1	0.37
PRKD3	0.37
CRY1	0.37
ZNF236	0.37
CLASP2	0.37
PTPRK	0.37
LIFR	0.37
ANKRD13C	0.37
GOLIM4	0.37
ZNF562	0.37
CNST	0.37
PIK3IP1	0.37
CASC4	0.36
RAB5A	0.36
UBE2J1	0.36
KIAA0232	0.36
RFK	0.36
MAN1A1	0.36
EGFR	0.36
RNF111	0.36
MAN2B2	0.36
NEURL1B	0.36
IL1R1	0.36
ARHGAP17	0.36
DYNC1LI2	0.36
HUWE1	0.36
MAPRE3	0.36
INPP1	0.36
IPMK	0.36
STYX	0.36
RQCD1	0.36
TOPORS	0.36
ZNF619	0.36
MTMR3	0.36
OAZ2	0.36
ERLIN2	0.36
KDM5A	0.36
ASH1L	0.36
USP4	0.36
PGGT1B	0.36
DENND2A	0.36
TRMT11	0.36
ZNF493	0.36
SIRPA	0.36
VPS37A	0.36
OSBPL9	0.36
FBXL7	0.36
ARFGAP3	0.36
N4BP1	0.36
CFD	0.36
ACTR1A	0.36
FURIN	0.36
ZNF385A	0.36
OLFML1	0.36
ANO6	0.36
KIAA1033	0.36
MTMR12	0.36
DOPEY2	0.36
C12orf5	0.36
TRAK2	0.36
POM121C	0.36
KIAA0564	0.36
NRBF2	0.36
KIAA1279	0.36
AP1G1	0.36
DCAF12	0.36
NAA16	0.36
VIM	0.36
APAF1	0.36
ATXN3	0.36
MFSD1	0.36
RNF138	0.36
CIC	0.36
ABCB10	0.36
ZDHHC5	0.36
MGC16121	0.36
FTSJD1	0.36
MTMR9L	0.36
ISLR	0.36
PRMT10	0.36
MED13	0.36
RSBN1	0.36
PPP6C	0.36
ZC3H4	0.36
C14orf106	0.36
SSH2	0.36
ZNF397	0.36
TAF1B	0.36
BNIP2	0.36
PNPLA8	0.36
ZNF449	0.36
RIPK1	0.36
POFUT1	0.36
UBE3C	0.36
VPS13C	0.36
DNAJC13	0.36
HAUS2	0.36
ACBD3	0.36
GNB4	0.36
ASAH1	0.36
C5	0.36
MCART1	0.36
TMBIM1	0.36
TMX3	0.36
BTBD1	0.36
ZNF160	0.36
RASA1	0.36
NBPF14	0.36
TNPO2	0.36
MCPH1	0.36
ZADH2	0.36
OSTF1	0.36
RNF103	0.36
ZNF778	0.36
ARPP19	0.36
ATN1	0.36
ZSCAN29	0.36
CREBZF	0.36
ZCCHC14	0.36
FDXACB1	0.36
ACVR1B	0.36
MDN1	0.36
ARID4B	0.36
DCTD	0.36
POM121	0.36
TMEM168	0.36
CAND1	0.36
DCP1A	0.36
TRA2B	0.36
YME1L1	0.36
WDR20	0.36
LOC653501	0.36
RAMP3	0.36
ME2	0.36
CD302	0.36
PPP3R1	0.36
ADNP2	0.36
EDEM3	0.36
TAF5L	0.36
CCDC50	0.36
RAB21	0.36
MPHOSPH8	0.36
F2RL3	0.36
MKL1	0.36
UBR7	0.36
VHL	0.36
POLR3B	0.36
AP3M2	0.36
CEP120	0.36
SPTBN1	0.36
LUC7L2	0.36
EEF2K	0.36
TNPO1	0.36
RNF152	0.36
LOC100270710	0.36
PAN3	0.36
PLEKHA2	0.36
BICD2	0.36
MAPKBP1	0.36
SAMD4B	0.36
USP8	0.36
ENPP4	0.36
ABL2	0.36
VPS36	0.36
PRPF4B	0.36
SETD5	0.36
RIMKLB	0.36
C10orf10	0.36
LRP10	0.36
PUS7L	0.36
ENTPD4	0.36
UBQLN1	0.36
SMG6	0.36
MAP2K1	0.36
RNF38	0.36
TET3	0.36
FAM167B	0.36
DYNC1H1	0.36
NSD1	0.36
C10orf119	0.36
G3BP2	0.36
RCHY1	0.36
PPP1R9B	0.36
IL17RA	0.36
ARHGEF7	0.36
CMIP	0.36
SNX4	0.36
MYH10	0.36
PLXDC2	0.36
SBF2	0.36
CAPRIN1	0.36
CLINT1	0.36
MTRF1L	0.36
GBF1	0.36
ZNF330	0.36
GATAD2B	0.36
ZNF845	0.36
LARP7	0.35
ALG9	0.35
ANKRD40	0.35
C14orf129	0.35
CRLF3	0.35
NPHP3	0.35
ZFYVE9	0.35
SLC31A1	0.35
FOXN3	0.35
ZNF532	0.35
PPP4R2	0.35
TMEM133	0.35
NEK9	0.35
FYCO1	0.35
DOCK8	0.35
PIK3C3	0.35
WTIP	0.35
TNKS	0.35
RBL2	0.35
KRR1	0.35
HERC4	0.35
KCTD7	0.35
WNK1	0.35
ATMIN	0.35
PPP1R13B	0.35
ARL2BP	0.35
ALG10B	0.35
GLS	0.35
WHAMM	0.35
STT3B	0.35
SLC2A13	0.35
NUP153	0.35
RCAN2	0.35
CBLB	0.35
PDE8A	0.35
PCF11	0.35
DENND3	0.35
ZNF674	0.35
LOC441208	0.35
CCDC92	0.35
LANCL1	0.35
HEATR5B	0.35
NFE2L2	0.35
SVIL	0.35
MAPK7	0.35
CUL3	0.35
FZD5	0.35
RHOQ	0.35
INTS2	0.35
ZNF567	0.35
CCDC126	0.35
CWF19L2	0.35
ZNF225	0.35
NUFIP2	0.35
C6orf192	0.35
C8orf4	0.35
KIAA1143	0.35
CSTF2T	0.35
INVS	0.35
MOBKL3	0.35
ABCE1	0.35
TBC1D20	0.35
MAP4K5	0.35
PLAA	0.35
MCL1	0.35
YWHAB	0.35
GNL3L	0.35
SERINC5	0.35
NR5A2	0.35
IPO7	0.35
SGMS2	0.35
SUFU	0.35
COL5A1	0.35
FAM161B	0.35
SMC3	0.35
PICALM	0.35
ZNF627	0.35
VPS53	0.35
INPP5K	0.35
SRCAP	0.35
ICMT	0.35
ZNF268	0.35
WDR37	0.35
IL18R1	0.35
USP28	0.35
RLF	0.35
RRN3	0.35
KDELC2	0.35
TBK1	0.35
MAN2A2	0.35
NEU3	0.35
ANUBL1	0.35
KIAA0040	0.35
HSPC159	0.35
KIAA1468	0.35
CLK4	0.35
ANKRD6	0.35
IPP	0.35
RPRD1B	0.35
PAQR3	0.35
EPB41L3	0.35
FBXO34	0.35
WDFY3	0.35
SESN1	0.35
RNF146	0.35
NAP1L5	0.35
STAT5B	0.35
ZFYVE16	0.35
C20orf194	0.35
LIN7C	0.35
MYO1D	0.35
MLLT4	0.35
NBEAL1	0.35
MRPL19	0.35
SYNJ2	0.35
TOR1B	0.35
PRPF40A	0.35
GLYR1	0.35
FRZB	0.35
ZNF326	0.35
LRIG2	0.35
RTF1	0.35
GIMAP1	0.35
DIDO1	0.35
ACVR2A	0.35
ZNF805	0.35
SEC63	0.35
NAV2	0.35
SPAST	0.35
WDTC1	0.35
ZNF772	0.35
SNX12	0.35
KDM5C	0.35
GRLF1	0.35
CLDND1	0.35
PDPR	0.35
FAM168B	0.35
REV1	0.35
UBE4A	0.35
SIAH1	0.35
SRPK2	0.35
L3MBTL3	0.35
ZNF33A	0.35
ATP8B1	0.35
NHLRC3	0.35
FAM73A	0.35
RAD23B	0.35
USP32	0.35
MYSM1	0.35
C16orf72	0.35
ZDHHC21	0.35
HOOK1	0.35
ZNF304	0.35
MTM1	0.35
EXT2	0.35
BCL9L	0.35
RFX1	0.35
PDZD8	0.35
C18orf1	0.35
FAM107A	0.35
SYNGAP1	0.35
MUDENG	0.35
MARK3	0.35
KLRAQ1	0.35
TMEM185B	0.35
HNRPLL	0.35
PLEKHO2	0.35
DOCK6	0.35
NR3C2	0.35
SIKE1	0.35
FOXJ3	0.35
NECAP1	0.35
EYA3	0.35
OSBPL1A	0.35
ESCO1	0.35
MPP5	0.35
MPV17	0.35
ZNF615	0.35
KIAA0226	0.35
LIN54	0.35
LPGAT1	0.35
ATP7A	0.35
GOLGA1	0.35
LMBRD2	0.35
ANGPT1	0.35
GPR77	0.35
GNPTAB	0.35
SCRN3	0.35
BRWD3	0.35
KIAA1310	0.35
PDCD4	0.34
ERBB2IP	0.34
CHMP7	0.34
KIAA0831	0.34
TACC1	0.34
SAMHD1	0.34
LYRM7	0.34
BRD3	0.34
BMPR1A	0.34
STAG2	0.34
MINK1	0.34
DLG4	0.34
SGMS1	0.34
TLR3	0.34
CASP3	0.34
2018-03-06	0.34
C15orf57	0.34
TMX1	0.34
PPM1F	0.34
C10orf18	0.34
ANK3	0.34
ADCY9	0.34
SGPP1	0.34
TTC21B	0.34
2018-03-03	0.34
HNF4G	0.34
DMTF1	0.34
BBX	0.34
GGCX	0.34
APH1B	0.34
LDB1	0.34
MMADHC	0.34
AFTPH	0.34
PITPNM1	0.34
AASDH	0.34
ACAD8	0.34
MXD4	0.34
PARP11	0.34
PPP1R3B	0.34
SEMA4B	0.34
CSNK1A1	0.34
C3orf54	0.34
ZNF618	0.34
FAP	0.34
THUMPD1	0.34
OSBPL11	0.34
LPAR6	0.34
FRG1B	0.34
DIP2A	0.34
SNX16	0.34
PXDN	0.34
LUZP6	0.34
FOXN2	0.34
NOTCH2	0.34
STK10	0.34
ERCC4	0.34
API5	0.34
PRPF8	0.34
CLCN3	0.34
ALMS1	0.34
GEFT	0.34
RASA4	0.34
USP53	0.34
MTX3	0.34
CD59	0.34
ZNF354B	0.34
ZNF587	0.34
JAK1	0.34
CDV3	0.34
FICD	0.34
TRIM33	0.34
NOC3L	0.34
KLHL9	0.34
YIPF6	0.34
PDCD6IP	0.34
FBXO30	0.34
PDCL	0.34
EHD4	0.34
PPIP5K2	0.34
PREPL	0.34
EIF4H	0.34
C1orf124	0.34
WASL	0.34
NGF	0.34
BTRC	0.34
ZNF527	0.34
VPS39	0.34
STXBP5	0.34
SCFD2	0.34
CDH1	0.34
ZC3H11A	0.34
LTC4S	0.34
KLF10	0.34
SCYL3	0.34
BAZ1B	0.34
COL1A1	0.34
POLR2B	0.34
UBN2	0.34
HDHD2	0.34
HNRNPK	0.34
HLCS	0.34
TBC1D24	0.34
SEC22C	0.34
LOC653653	0.34
PIK3R1	0.34
SAV1	0.34
ACTR3	0.34
ASB8	0.34
MAPK6	0.34
C12orf51	0.34
CDC73	0.34
ZNF12	0.34
ATG16L1	0.34
FXC1	0.34
NDUFS1	0.34
C14orf126	0.34
RIN2	0.34
ZNF583	0.34
SLC30A7	0.34
NAA15	0.34
PLS3	0.34
LIX1L	0.34
BRPF1	0.34
STIM2	0.34
HMG20A	0.34
DCAF10	0.34
FBXO28	0.34
CTTNBP2NL	0.34
CDYL	0.34
PRCP	0.34
FNIP1	0.34
KIF16B	0.34
PCYOX1	0.34
FAF2	0.34
RGPD4	0.34
INHBA	0.34
BACH1	0.34
RNF185	0.34
FRS2	0.34
GLG1	0.34
XIAP	0.34
CDH11	0.34
ADRBK1	0.34
GOLGB1	0.34
KLHL15	0.34
BMI1	0.34
BTAF1	0.34
ETS2	0.34
ZNF765	0.34
EGR2	0.34
C15orf29	0.34
ZBTB37	0.34
GPC6	0.34
PAPOLA	0.34
ITPRIPL2	0.34
IMPACT	0.34
SRRM1	0.34
PPP2R5B	0.34
ALS2CR8	0.34
MNT	0.34
CALM1	0.34
EPM2AIP1	0.34
RUFY2	0.34
APOL6	0.34
NUPL1	0.34
COPS2	0.34
KCNMB1	0.34
PNRC1	0.34
LAMC1	0.34
IDH3A	0.34
PHLDB1	0.34
MSL2	0.34
RECK	0.34
DENND4C	0.34
ZNF828	0.34
HGSNAT	0.34
PNMA1	0.33
LMAN1	0.33
SMC6	0.33
ZNF146	0.33
ANKDD1A	0.33
INTS7	0.33
EIF4E	0.33
URGCP	0.33
CPXM1	0.33
2018-09-02	0.33
BHLHE40	0.33
ZCCHC2	0.33
MPHOSPH9	0.33
FNDC3B	0.33
TPR	0.33
AP2A2	0.33
ARID1A	0.33
ZNF434	0.33
GPCPD1	0.33
SMC1A	0.33
2018-03-07	0.33
MOBKL1A	0.33
GIMAP7	0.33
COPS8	0.33
JAM2	0.33
LRRC40	0.33
FBXW11	0.33
CSNK1G3	0.33
RNF130	0.33
TMEM119	0.33
C11orf46	0.33
DHX36	0.33
GTF3C3	0.33
WNT3	0.33
RHOBTB2	0.33
MTSS1L	0.33
UBE2D3	0.33
SMCHD1	0.33
WEE1	0.33
SF3A1	0.33
MARK2	0.33
NUDT4	0.33
LRRC57	0.33
RNF11	0.33
NAT1	0.33
EPHA2	0.33
MRE11A	0.33
ZNF234	0.33
PER2	0.33
CXXC5	0.33
LDOC1L	0.33
UBAP1	0.33
TOP1P1	0.33
FNBP4	0.33
ABI1	0.33
MAPKSP1	0.33
DST	0.33
IRAK4	0.33
PLSCR3	0.33
HES1	0.33
TMCO7	0.33
ATP6V0A2	0.33
KAT5	0.33
SNW1	0.33
SMURF2	0.33
URB2	0.33
C5orf51	0.33
TRIOBP	0.33
ATXN1L	0.33
KCTD3	0.33
TTC33	0.33
ZNF675	0.33
RYBP	0.33
CD4	0.33
RBM33	0.33
KIAA1530	0.33
TRAF3	0.33
HNRNPF	0.33
TNPO3	0.33
DAAM1	0.33
INPP5A	0.33
C9orf78	0.33
GYS1	0.33
CLCC1	0.33
PIK3R5	0.33
EZR	0.33
DHX15	0.33
SURF4	0.33
ZKSCAN1	0.33
COPB2	0.33
CDC27	0.33
KDM5B	0.33
LINS1	0.33
SYNCRIP	0.33
SP2	0.33
ZNF143	0.33
TMEM123	0.33
ZMPSTE24	0.33
TMEM88	0.33
FGL2	0.33
ANXA1	0.33
HLTF	0.33
STAM	0.33
USP24	0.33
RAI14	0.33
ZFP30	0.33
ZBTB26	0.33
CLTC	0.33
DVL3	0.33
NCBP1	0.33
PPFIBP2	0.33
PTPN3	0.33
OSBPL5	0.33
MAX	0.33
AP1S2	0.33
C2CD3	0.33
DDX18	0.33
ZBED1	0.33
GORAB	0.33
CHMP2B	0.33
NFAT5	0.33
NIPA2	0.33
FKTN	0.33
ANKH	0.33
GUF1	0.33
[truncated: 865 more rows]
